# Supplementary material for: miR-128 plays a critical role in murine osteoclastogenesis and estrogen deficiency-induced bone loss
Source: PubMed Central journal article supplement (PMC7150474; doi:10.7150/thno.42982), 2020-03-04
Supplement: thnov10p4334s1.pdf [file thnov10p4334s1.pdf]

## Supplementary material

### Supplementary Figure legends:

#### Supplementary Figure 1: Gene expression after overexpression, knockdown, or knockout. A, B

The transfection efficiencies of miR-128 mimic or inhibitor. Data are mean  $\pm$  SD.  $**P < 0.01$  by Student's *t* test. C *miR-128* levels in BMMs from *miR-128<sup>Oc-/-</sup>* mice. Data are mean  $\pm$  SD.  $**P < 0.01$  by Student's *t* test. D Representative images of *WT* and *miR-128<sup>Oc-/-</sup>* male mice at 10 weeks old. E The efficiencies of siRNA of SIRT1. Data are mean  $\pm$  SD.  $**P < 0.01$  by Student's *t* test.

#### Supplementary Figure 2: Cell proliferation and apoptosis assay. A BMMs were cultured in the

presence of M-CSF and RANKL with miR-128 mimic or inhibitor. Data are mean  $\pm$  SD. Not statistically significant by one-way ANOVA with Tukey's *post hoc* test. B BMMs were isolated from the *WT* and *miR-128<sup>Oc-/-</sup>* mice. Data are mean  $\pm$  SD. Not statistically significant by Student's *t* test. C BMMs derived from *WT* and *miR-128<sup>Oc-/-</sup>* mice that were transfected with the siCtrl or siSIRT1. Data are mean  $\pm$  SD. Not statistically significant by two-way ANOVA.

#### Supplementary Figure 3: Osteoclastic miR-128 deficiency does not affect osteoblastogenesis. A

Representative H&E-stained sections (yellow arrows: osteoblasts) of trabecular bone (Tr.B) and histomorphometric analysis of osteoblast surfaces (Ob.S/BS). Scale bars: 100  $\mu$ m. Data are mean  $\pm$  SEM. Not statistically significant by Student's *t* test. B Mineralizing surface (MS/BS), mineral apposition rate (MAR), bone formation rate (BFR) were analyzed in calcein double-labeled plastic sections of mice vertebrae. Data are mean  $\pm$  SEM. Not statistically significant by Student's *t* test. C Serum osteocalcin values tested by ELISA. Data are mean  $\pm$  SEM. Not statistically significant by Student's *t* test. D Osteogenic differentiation of osteoblastic stromal cells harvested from *WT* and *miR-128<sup>Oc-/-</sup>* mice. ALP staining and ARS staining were carried out. E-F Quantitative analyses of the ALP activity and calcium mineralization. Data are mean  $\pm$  SD.  $**P < 0.01$  by Student's *t* test. G qRT-PCR analysis of mRNA expression of *Runx2*, *Sp7*, *Alp*, and *Ocn*. Data are mean  $\pm$  SD.  $**P < 0.01$  by Student's *t* test.

#### Supplementary Figure 4: Quantitative analyses of Western blotting results. A Osteoclastic

miR-128 deficiency significantly increased SIRT1 protein level, while decreased p65-Acetyl 310 protein level. Data are mean  $\pm$  SD.  $**P < 0.01$  by Student's *t* test. B SIRT1 knockdown in BMMs significantly recovered the decreased expression of p65-Acetyl 310 induced by osteoclastic miR-128 deficiency. Data are mean  $\pm$  SD.  $**P < 0.01$  by two-way ANOVA.

**Supplementary Figure 5: Osteoclastic miR-128 deficiency does not affect osteoblastogenesis in OVX mice.** **A** Representative H&E-stained sections (yellow arrows: osteoblasts) of trabecular bone (Tr.B), and histomorphometric analysis of osteoblast surfaces (Ob.S/BS). Scale bars: 100  $\mu$ m. Data are mean  $\pm$  SEM. Not statistically significant by two-way ANOVA. **B** Mineralizing surface (MS/BS), mineral apposition rate (MAR), bone formation rate (BFR) were analyzed in calcein double-labeled plastic sections of mice vertebrae. Data are mean  $\pm$  SEM. Not statistically significant by two-way ANOVA. **C** Serum osteocalcin values tested by ELISA. Data are mean  $\pm$  SEM. Not statistically significant by two-way ANOVA.

Supplementary Figure 1:

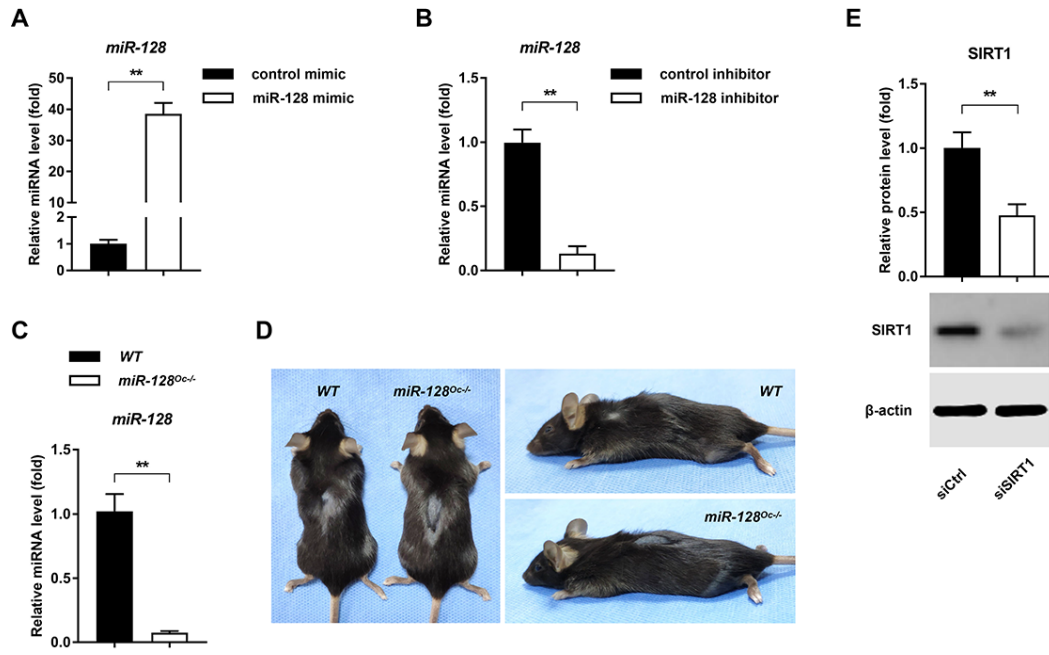

Supplementary Figure 2:

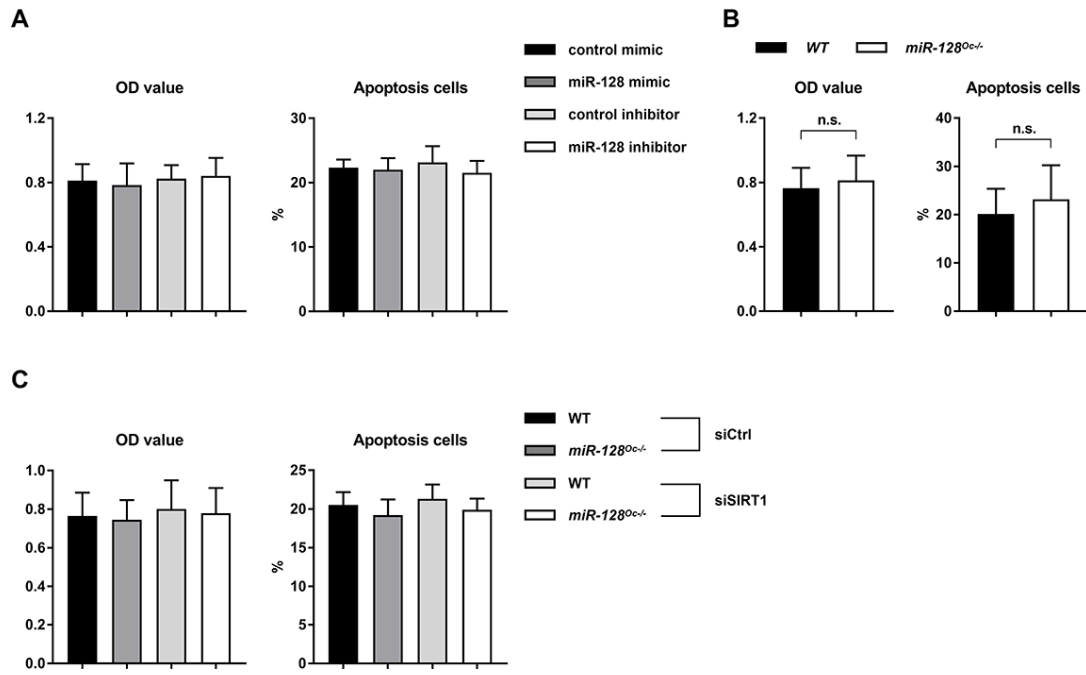

Supplementary Figure 3:

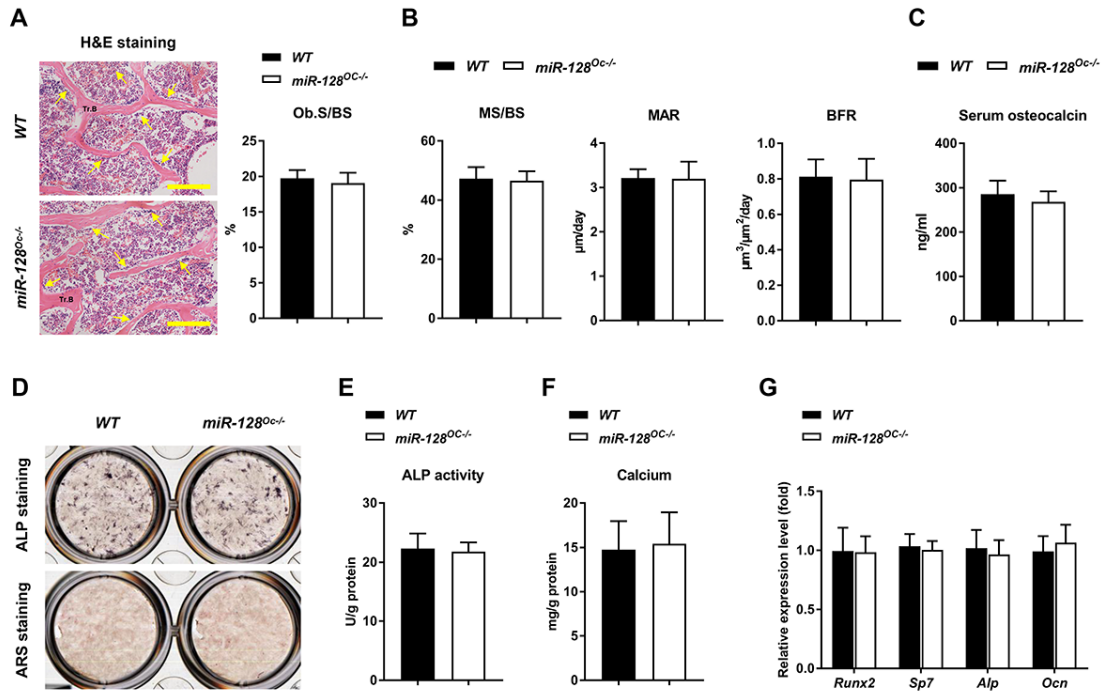

Supplementary Figure 4:

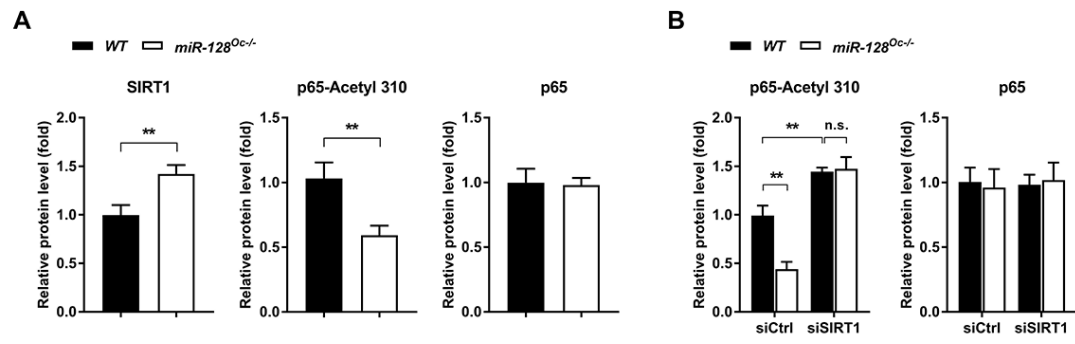

Supplementary Figure 5:

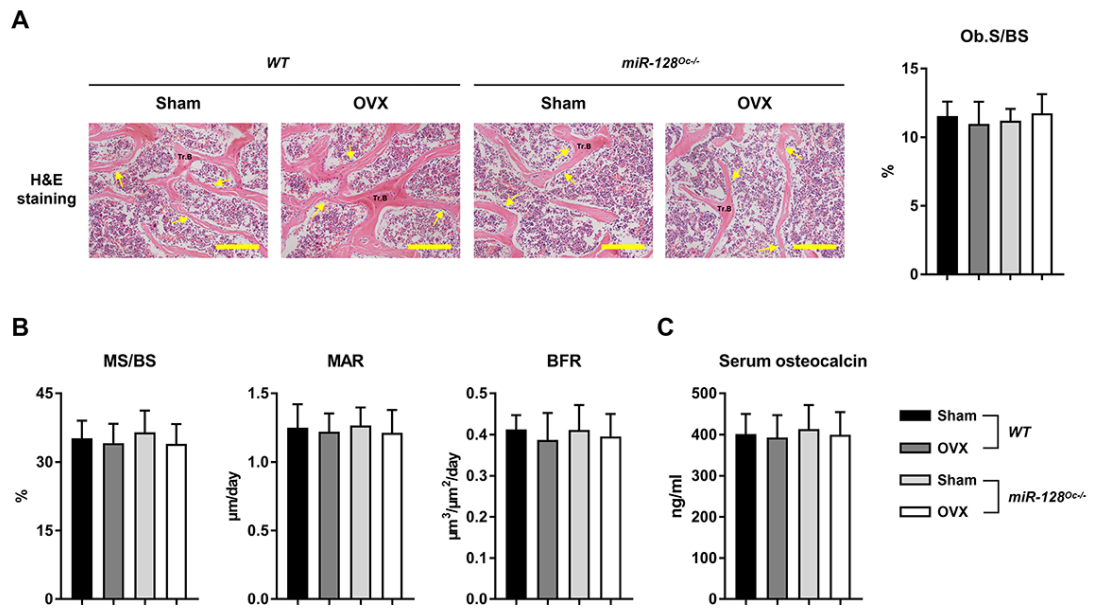

**Supplementary Table 1. Sequences of siRNA, probe and primers.**

| <b>Item</b>                       | <b>Sequence</b>                                                     |
|-----------------------------------|---------------------------------------------------------------------|
| siSIRT1                           | GCTGTTCGTGGAGACATTT                                                 |
| SIRT1 pull down probe             | AAGGCGAGCATAGATACCGT                                                |
| mmu-SIRT1 qRT-PCR primers         | Forward: GCTGACGACTTCGACGACG<br>Reverse: TCGGTCAACAGGAGGTTGTCT      |
| mmu-miR-128 qRT-PCR primers       | Forward: GGTCACAGTGAACCGGTC<br>Reverse: GTGCAGGGTCCGAGGT            |
| mmu-U6 qRT-PCR primers            | Forward: GTGCTCGCTTCGGCAGCACATAT<br>Reverse: AAAATATGGAACGCTTCACGAA |
| mmu-Nfatc1 qRT-PCR primers        | Forward: CCCGTCACATTCTGGTCCAT<br>Reverse: CAAGTAACCGTGTAGCTCCACAA   |
| mmu-Traf6 qRT-PCR primers         | Forward: AAAGCGAGAGATTCTTTCCCTG<br>Reverse: ACTGGGGACAATTCCTAGAGC   |
| mmu-Ctsk qRT-PCR primers          | Forward: GAAGAAGACTCACCAGAAGCAG<br>Reverse: TCCAGGTTATGGGCAGAGATT   |
| mmu-c-Fos qRT-PCR primers         | Forward: CGGGTTTCAACGCCGACTA<br>Reverse: TTGGCACTAGAGACGGACAGA      |
| mmu-c-Src qRT-PCR primers         | Forward: GAACCCGAGAGGGACCTTC<br>Reverse: GAGGCAGTAGGCACCTTTTGT      |
| mmu-Tnf- $\alpha$ qRT-PCR primers | Forward: CCCTCACACTCAGATCATCTTCT<br>Reverse: GCTACGACGTGGGCTACAG    |
| mmu-IL-1 qRT-PCR primers          | Forward: CGAAGACTACAGTTCTGCCATT<br>Reverse: GACGTTTCAGAGGTTCTCAGAG  |
| mmu-GAPDH qRT-PCR primers         | Forward: ATCAAGAAGGTGGTGAAGCA<br>Reverse: AGACAACCTGGTCCTCAGTGT     |
| mmu-Runx2 qRT-PCR primers         | Forward: GACCAGTCTTACCCCTCCTA<br>Reverse: GGCAGTGTTCATCATCTGAAA     |
| mmu-Sp7 qRT-PCR primers           | Forward: AAAGGAGGCACAAAGAAGC<br>Reverse: CAGGAAATGAGTGAGGGAAG       |
| mmu-Alp qRT-PCR primers           | Forward: GCTTTAAACCCAGACACAAG<br>Reverse: AAGAAGAAGCCTTTGAGGTT      |
| mmu-Ocn qRT-PCR primers           | Forward: CTCTCTCTGCTCACTCTGCT<br>Reverse: GACTGAGGCTCCAAGGTAG       |
| hsa-miR-128 qRT-PCR primers       | Forward: AACTCCAGCTGGGTCACAGTGAACCGGTC                              |



---

|                            |                                |
|----------------------------|--------------------------------|
|                            | Reverse: TGGTGTCTGGAGTCG       |
| hsa-U6 qRT-PCR primers     | Forward: CTCGCTTCGGCAGCACA     |
|                            | Reverse: AACGCTTACGAATTTGCGT   |
| hsa-Nfatc1 qRT-PCR primers | Forward: AAAGACGCAGAAACGACG    |
|                            | Reverse: TCTACTAACGGGACATCAC   |
| hsa-GAPDH qRT-PCR primers  | Forward: ATCAAGAAGGTGGTGAAGCA  |
|                            | Reverse: GTCGCTGTTGAAGTCAGAGGA |

---
